# Supplementary material for: Glucose-assisted combustion synthesis of Li1.2Ni0.13Co0.13Mn0.54O2 cathode materials with superior electrochemical performance for lithium-ion batteries
Source: Royal Society of Chemistry journal article supplement (doi:10.1039/c6ra15639h), 2016-01-01
Supplement: c6ra15639h1.pdf [file c6ra15639h1.pdf]

### Electronic Supplementary Information for

#### Glucose-assisted combustion synthesis of $\text{Li}_{1.2}\text{Ni}_{0.13}\text{Co}_{0.13}\text{Mn}_{0.54}\text{O}_2$ cathode materials with superior electrochemical performance for lithium-ion batteries

Honglei Li, Shichao Zhang\*, Xin Wei, Puheng Yang, Zhixu Jian, Juan Meng

School of Materials Science and Engineering, Beihang University, Beijing 100191, PR China. E-mail: csc@buaa.edu.cn (S. Zhang). Tel.: +86 01082339319; Fax: +86 01082338148.

#### Supplementary Figures

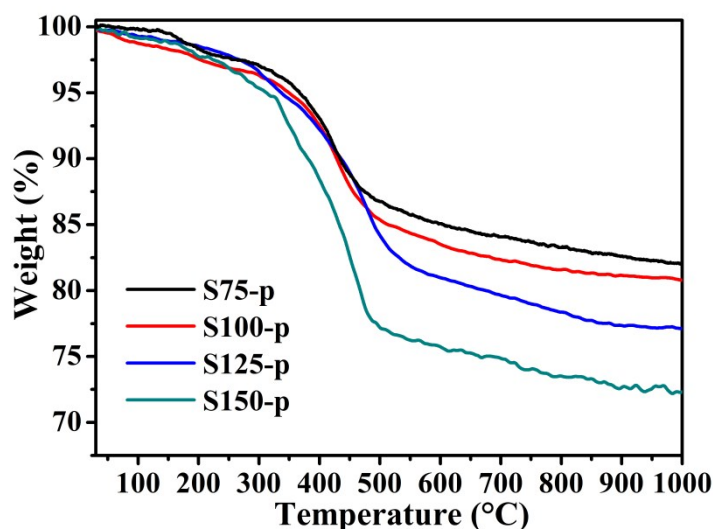

**Fig. S1** TG curves of the precursors obtained under air atmosphere with a heating rate of 10 °C/min.

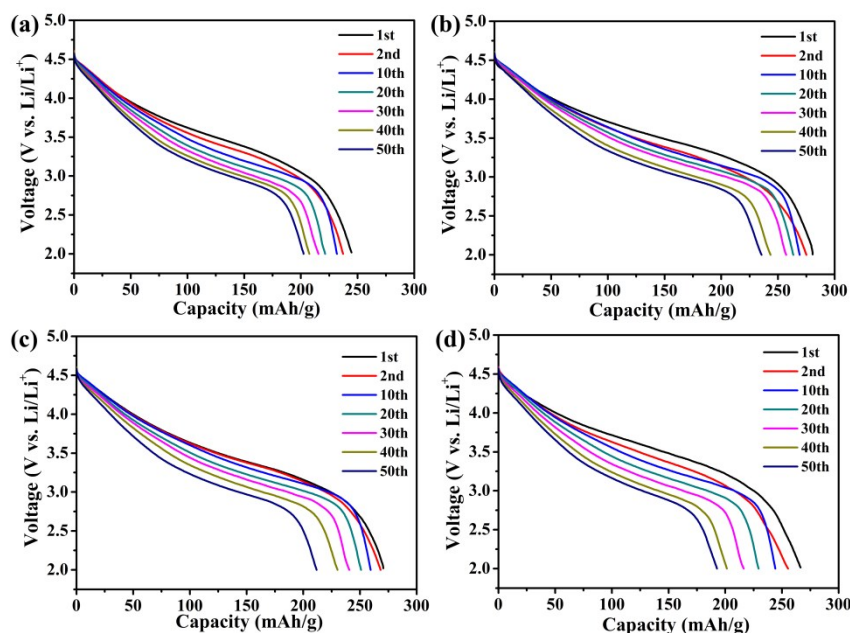

**Fig. S2** Discharge profiles after various cycling at 0.1 C in a voltage range of 2.0 to 4.8 V for all samples: (a) S75; (b) S100; (c) S125; (d) S150.
